# Supplementary material for: Local Quantum Theory with Fluids in Space-Time
Source: MDPI journal article supplement (doi:10.3390/quantum5010011), 2023-02-21
Supplement: s1 [file s1]

Archive with 1 entries (1 files):
- quantumrep-2174573-supplementary.pdf
